# Supplementary material for: Case–control study of diarrheal disease etiology in individuals over 5 years in southwest China
Source: Springer Nature journal article supplement (doi:10.1186/s13099-016-0141-1), 2016-11-16
Supplement: MOESM1 [file 11053986]

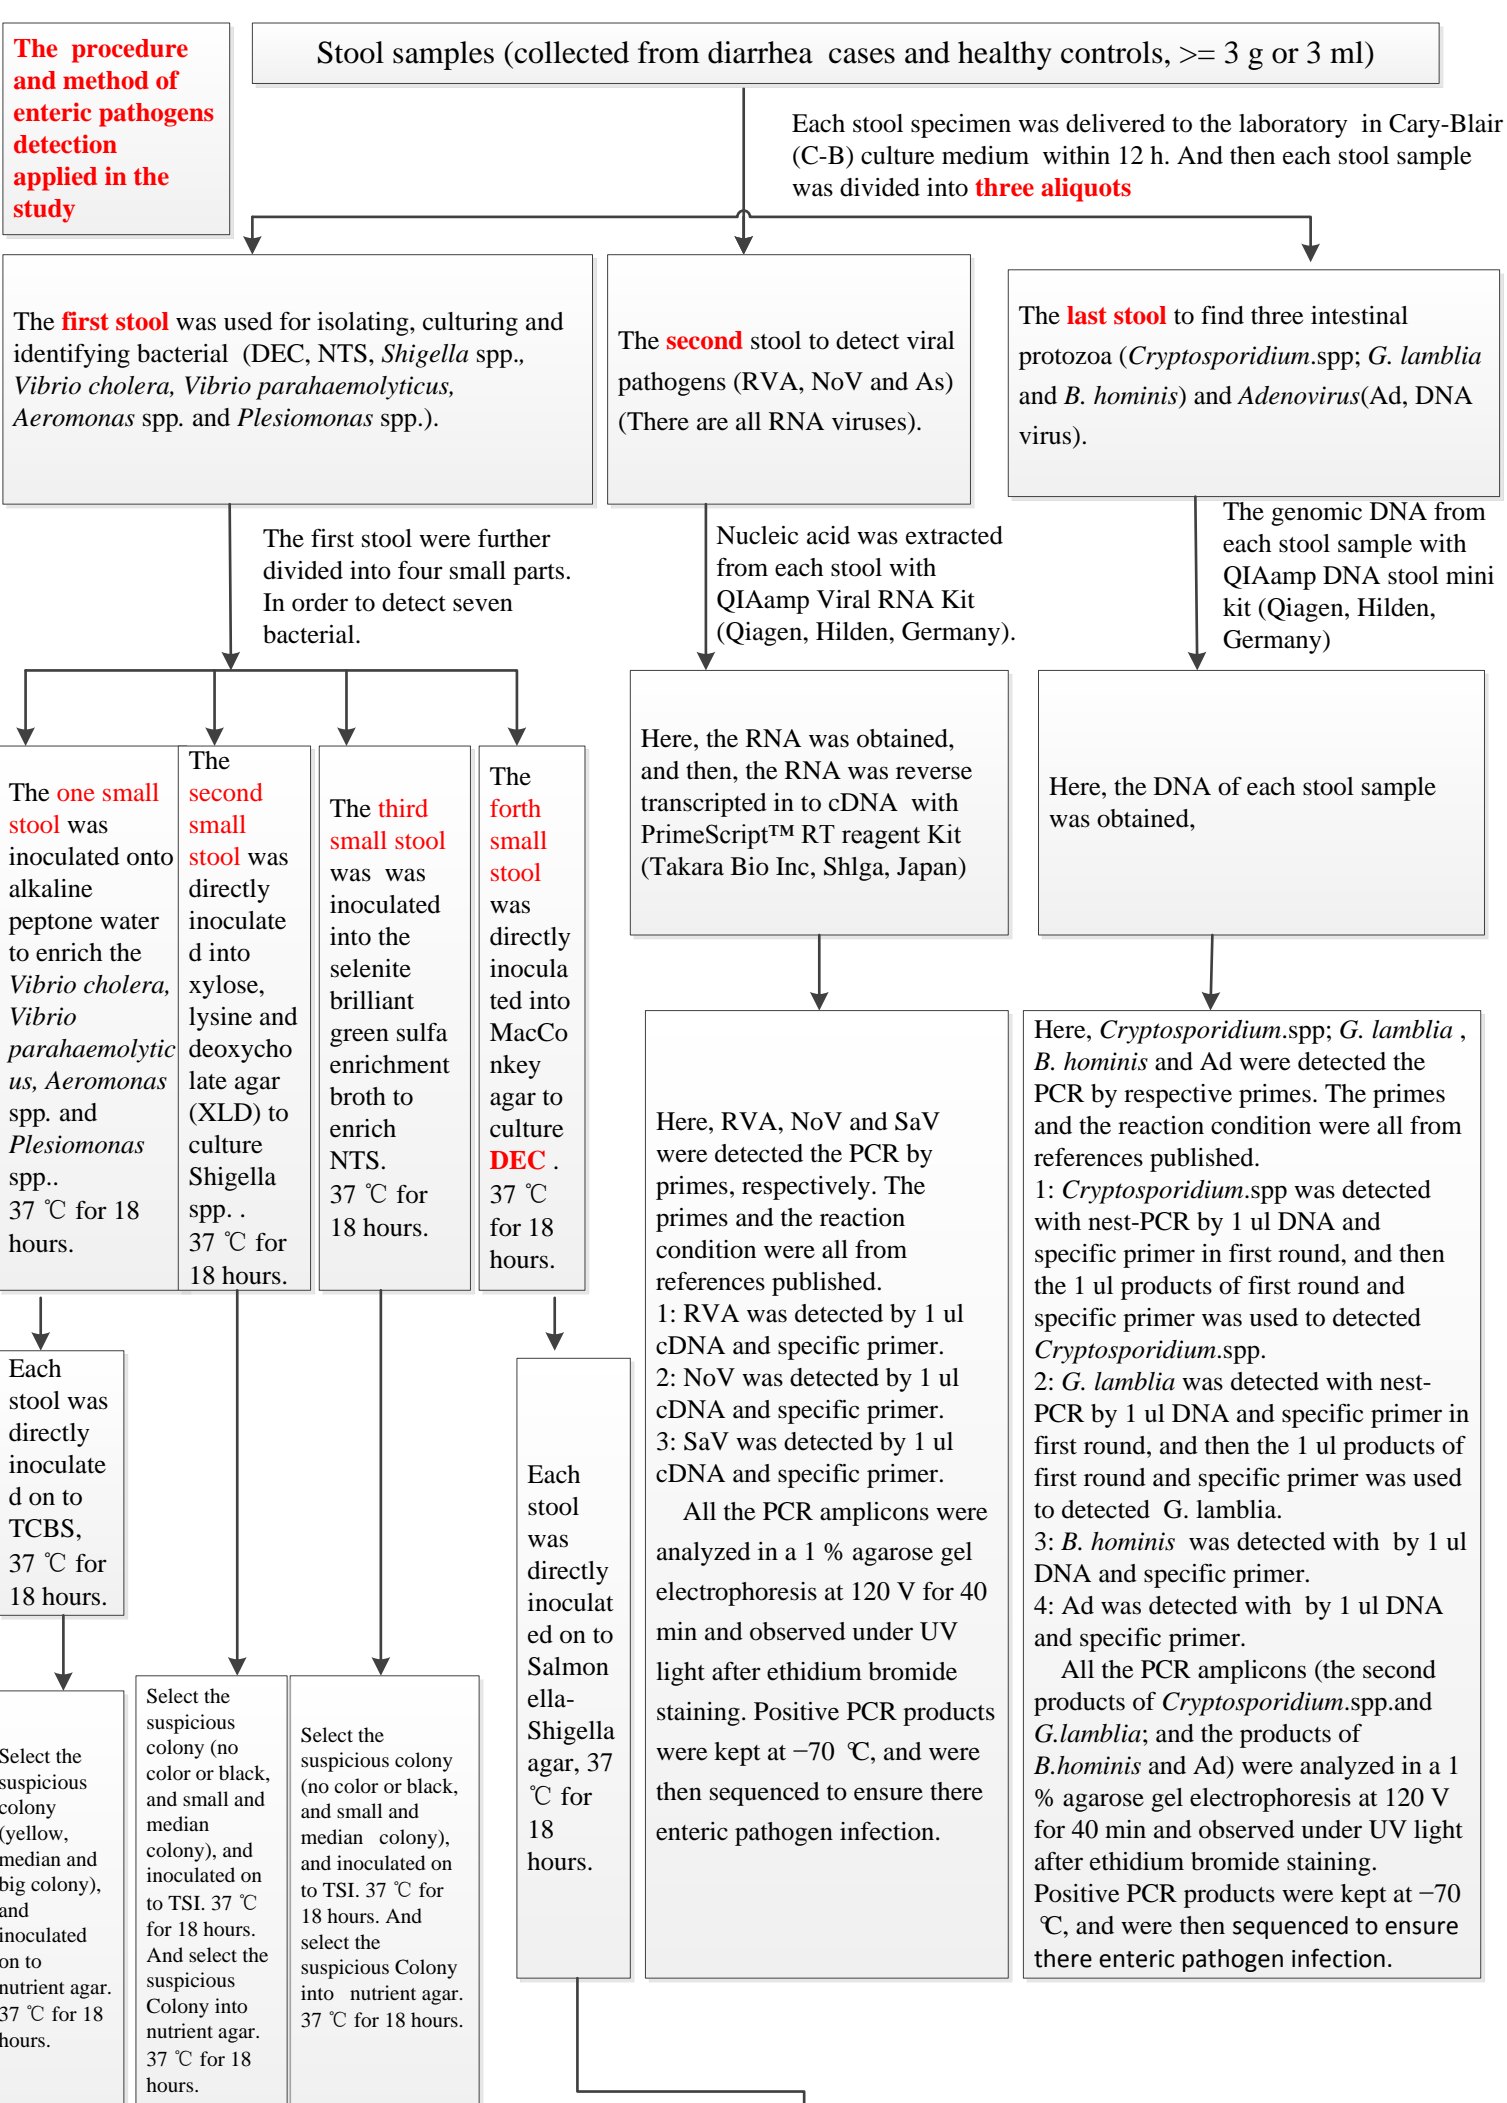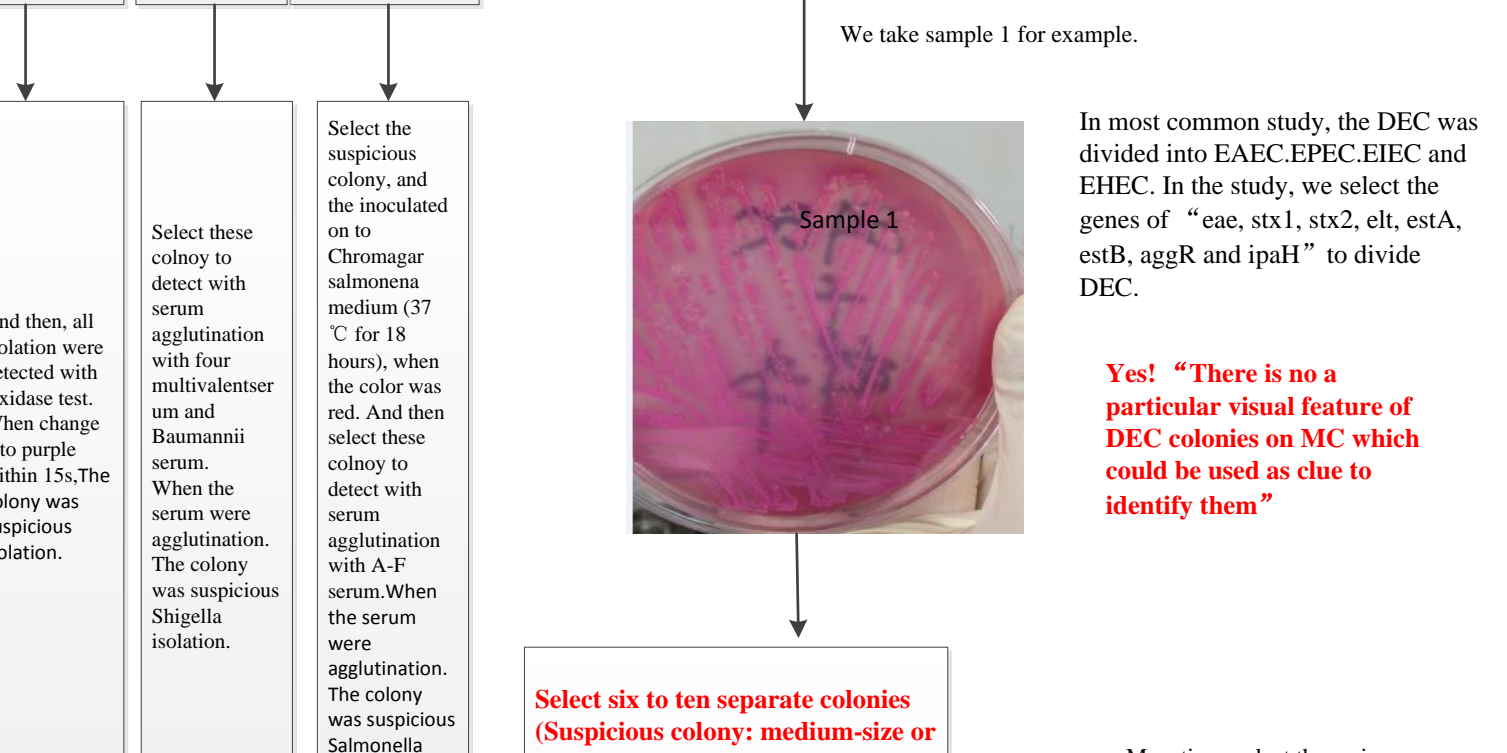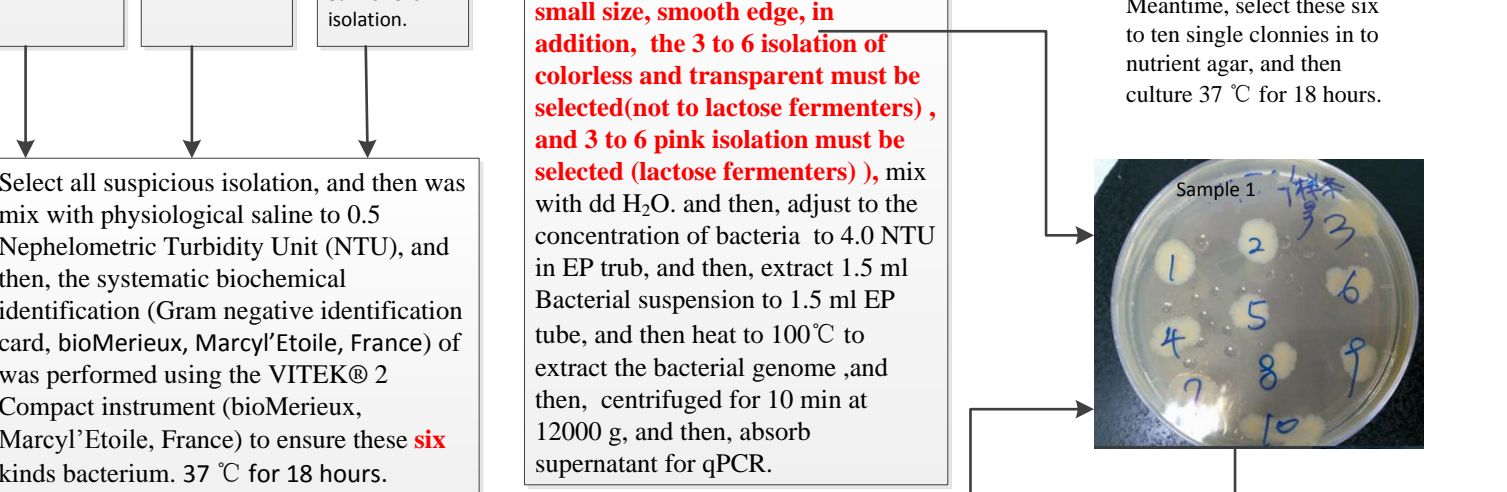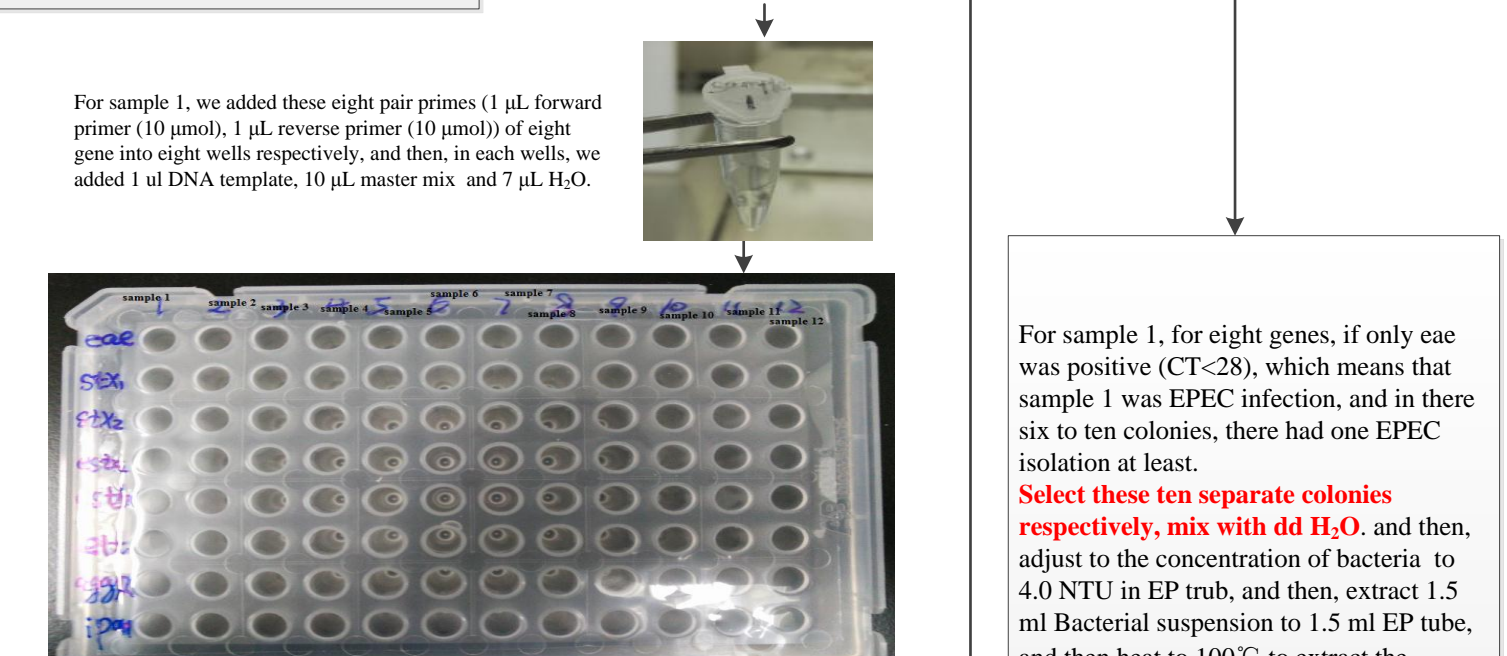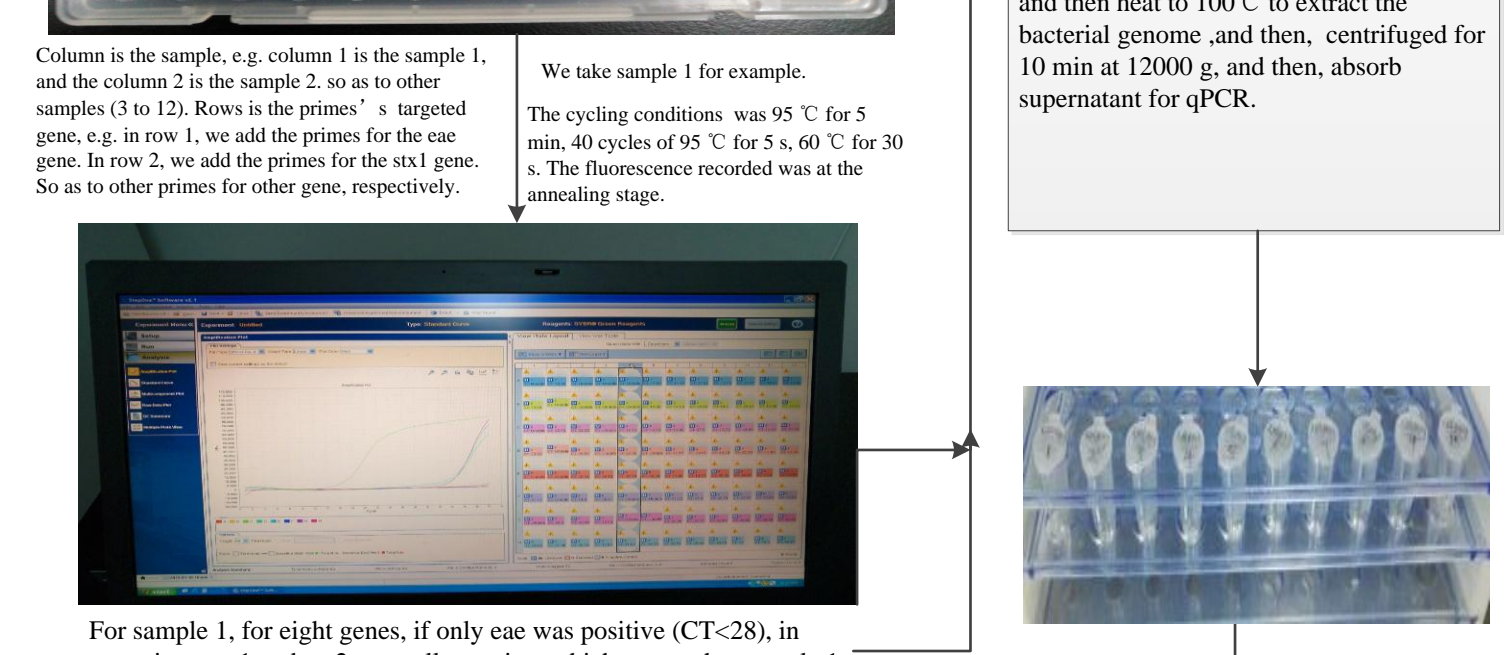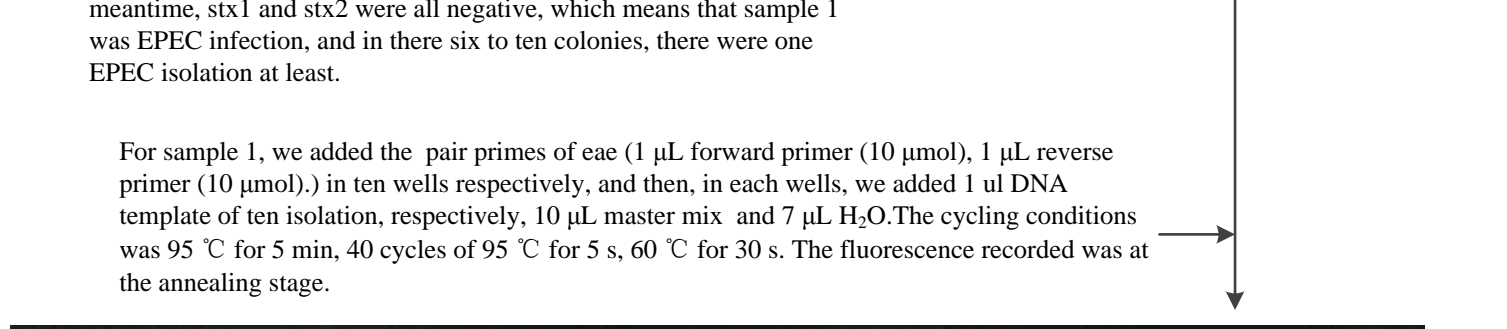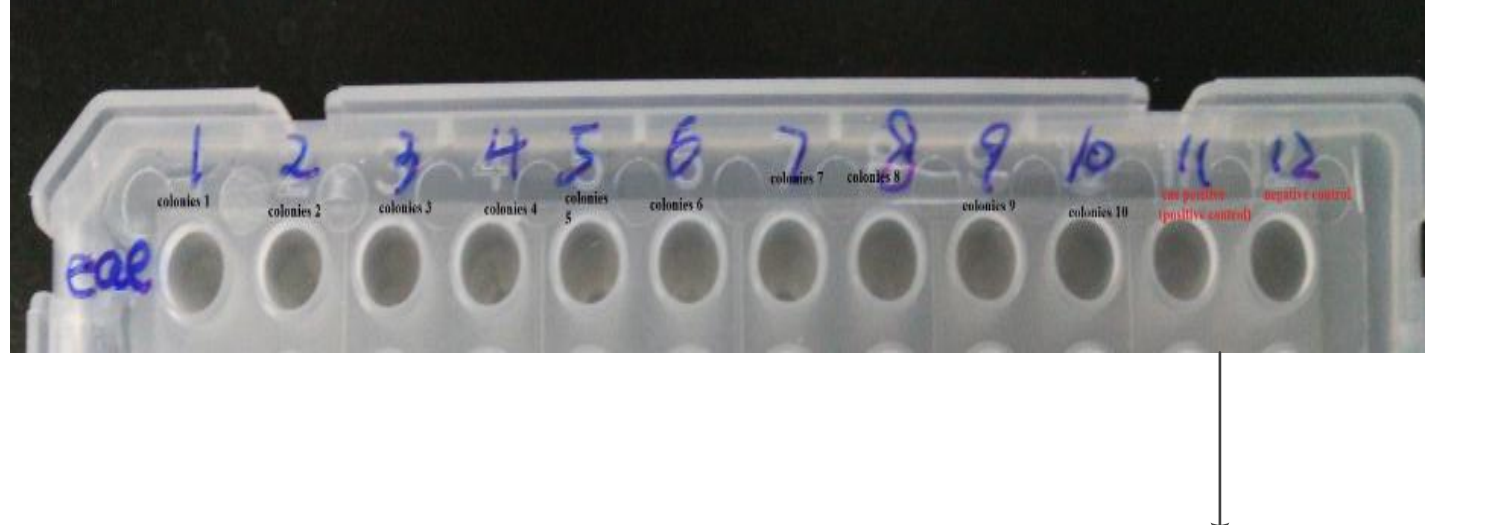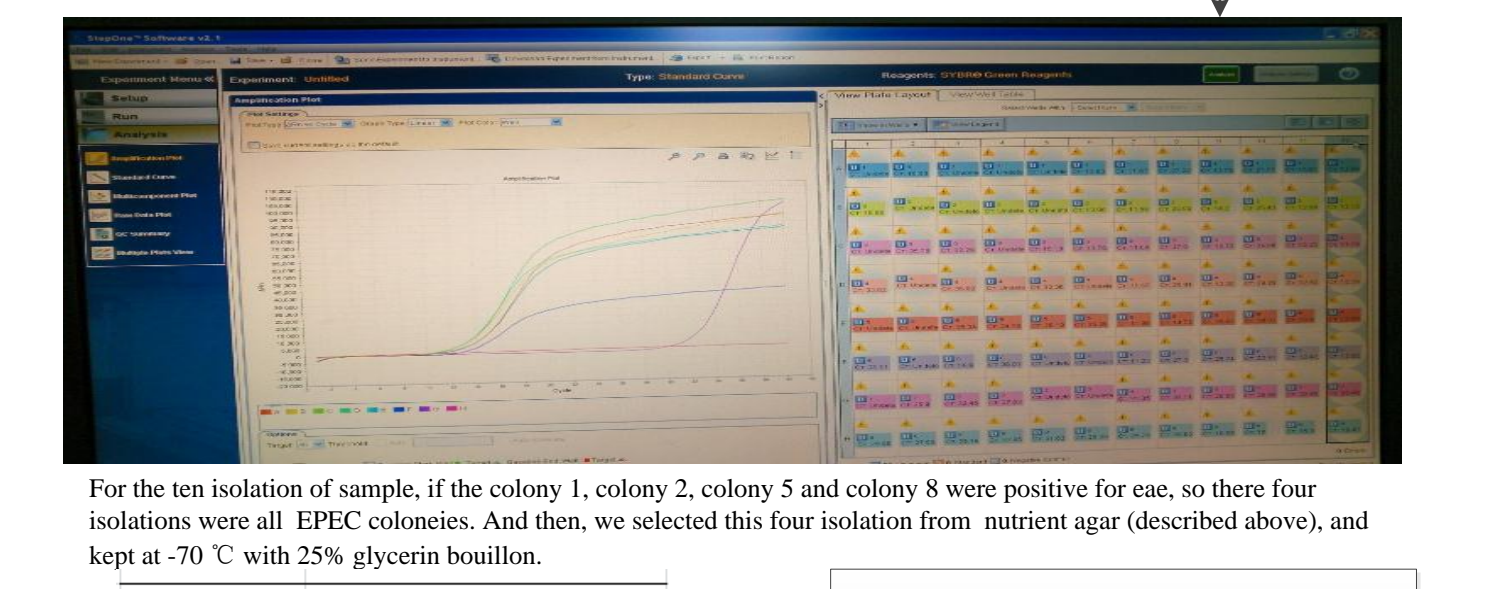

| DECs | Judging standard                |
|------|---------------------------------|
| EPEC | eae+                            |
| EAEC | aggR+                           |
| EIEC | ipaH+                           |
| EHEC | eae+, and (stx1+, and/or stx2+) |
| ETEC | hlt+, and/or estA, and/or estB+ |

The detection methods of enteric pathogens applied in this work were all from papers published previously .
